# Supplementary material
Source: ML conference proceedings conference paper supplement (https://www.ecva.net/papers/eccv_2020/papers_ECCV/html/123660511_ECCV_2020_paper.php)
Supplement: Supplementary file 2 [file 123660511-supp.zip]

Archive with 3 entries (2 files):
- 3794-Supplementary/
- 3794-Supplementary/Monocular_Differentiable_Rendering_for_Self-Supervised_3D_Object_Detection_Video.mp4
- 3794-Supplementary/3794-Supplementary.pdf
